# Supplementary material for: Gas6 Prevents Epithelial-Mesenchymal Transition in Alveolar Epithelial Cells via Production of PGE2, PGD2 and Their Receptors
Source: Cells. 2019 Jun 26;8(7):643. doi: 10.3390/cells8070643 (PMC6678614; doi:10.3390/cells8070643)
Supplement: Supplementary file 1 [file cells-08-00643-s001.pdf]

## **Online Supplement**

### **Gas6 prevents epithelial-mesenchymal transition in alveolar epithelial cells**

Ji-Hae Jung, Ye-Ji Lee, Youn-Hee Choi, Eun-Mi Park, Hee-Sun Kim, and Jihee Lee  
Kang\*

\*Correspondence should be addressed to:

[jihee@ewha.ac.kr](mailto:jihee@ewha.ac.kr)

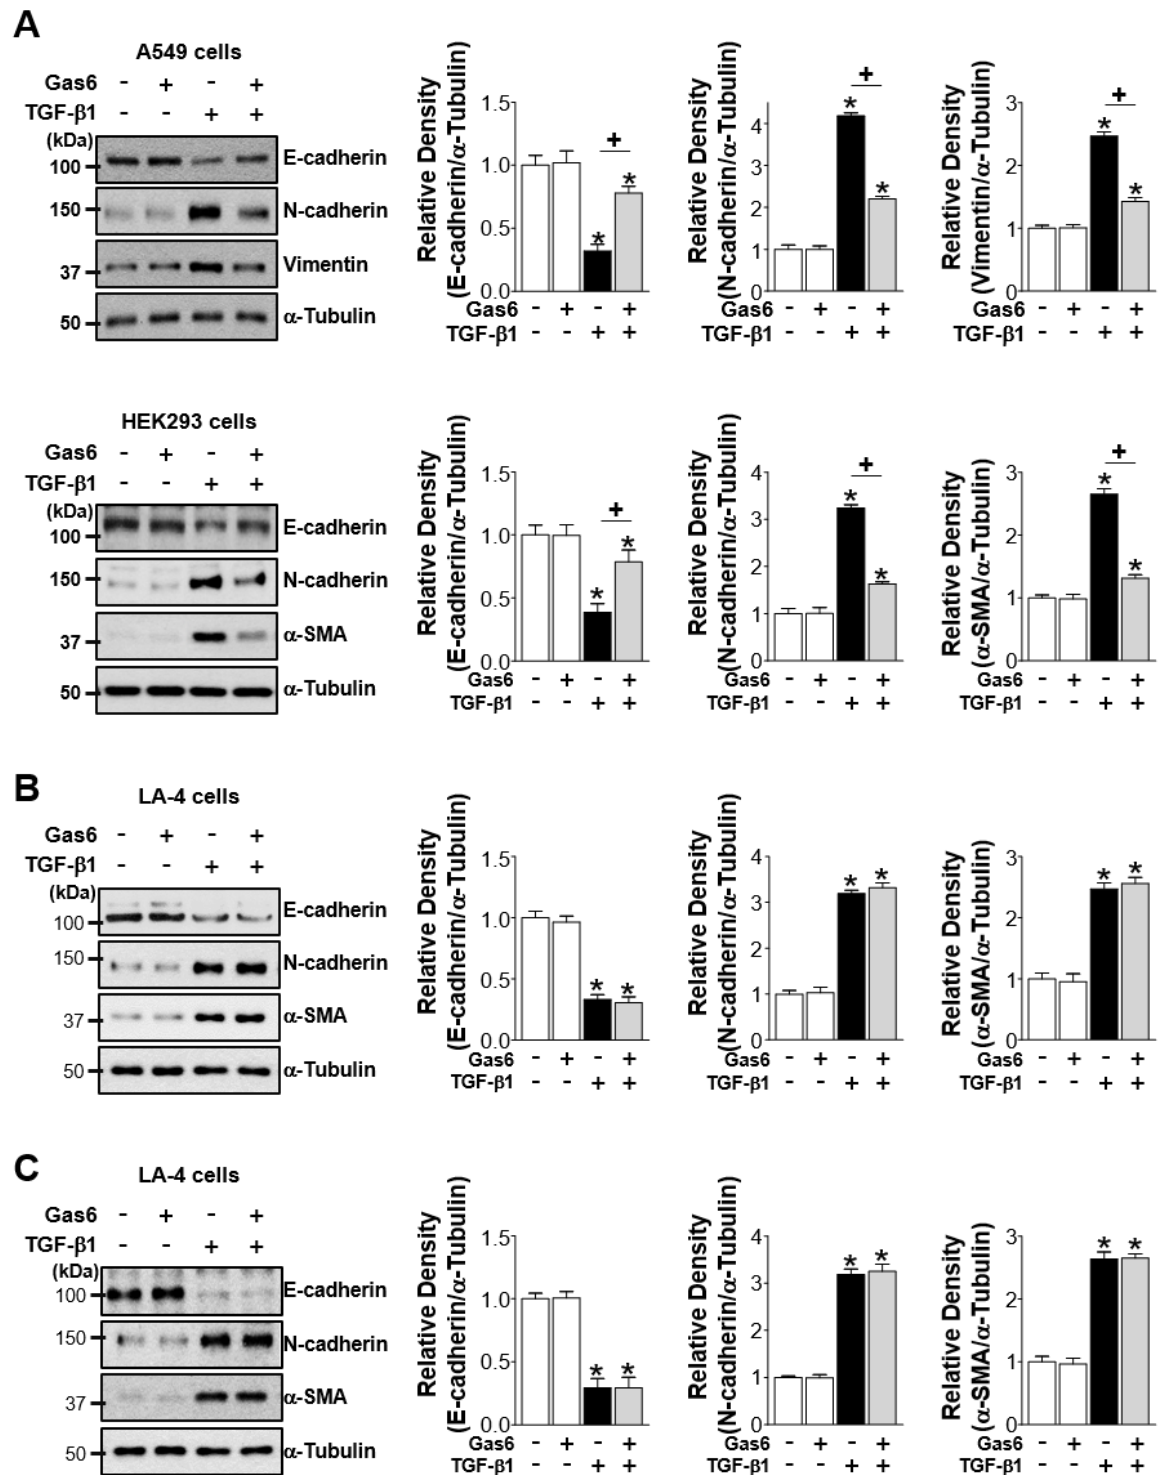

**Fig. S1. Effect of Gas6 on TGF- $\beta$ 1-induced epithelial-mesenchymal transition (EMT) in lung and kidney epithelial cells.** (A) Immunoblots analysis of the relative amounts of EMT markers in total cell lysates of A549 cells and HEK293 pretreated with 400 ng/ml Gas6 for 20 h and then stimulated with 10 ng/mL TGF- $\beta$ 1 for 72 h. (B) Immunoblot analysis of the relative amounts of EMT markers in LA-4 cells pretreated with 400 ng/ml Gas6 for 2 h and then stimulated with 10 ng/mL TGF- $\beta$ 1 for 72 h. (C)

Immunoblot analysis of the relative amounts of EMT markers in LA-4 cells, which were pretreated with 400 ng/ml Gas6 for 20 h, and then washed out with fresh media before stimulation with 10 ng/ml TGF- $\beta$ 1 for 72 h. Densitometric analysis of the indicated EMT markers' relative abundances. Values represent the mean  $\pm$  s.e.m. of three independent experiments. \* $P$  < 0.05; compared with control; + $P$  < 0.05 as indicated. Results are representative of three independent experiments.

**A**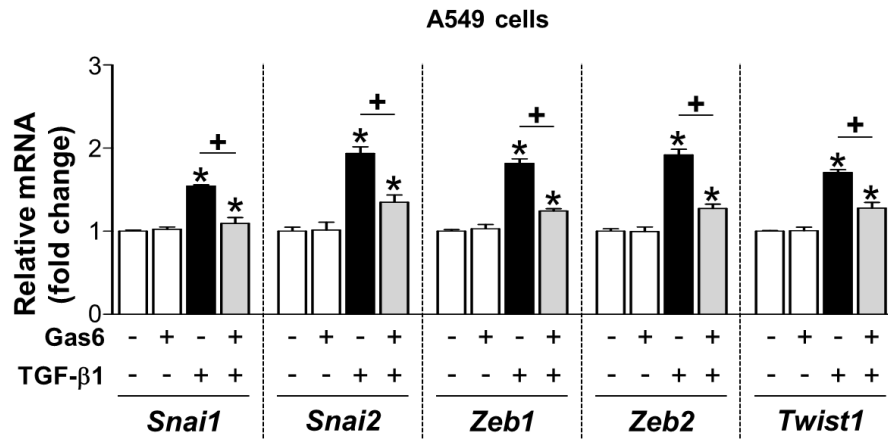**B**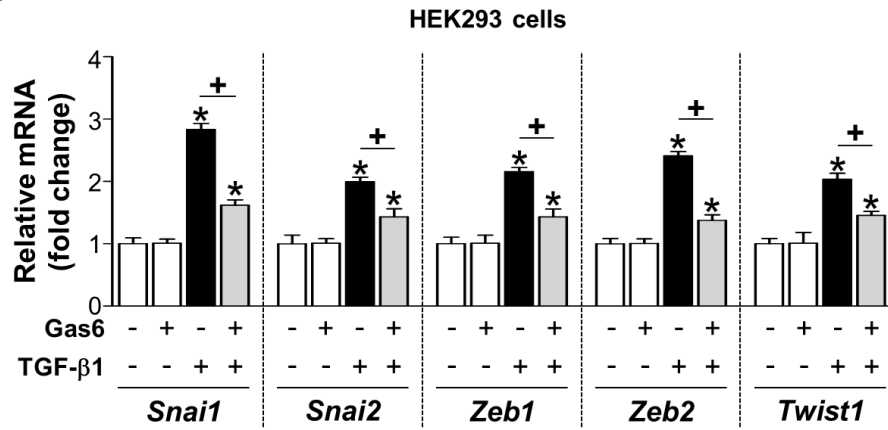**C**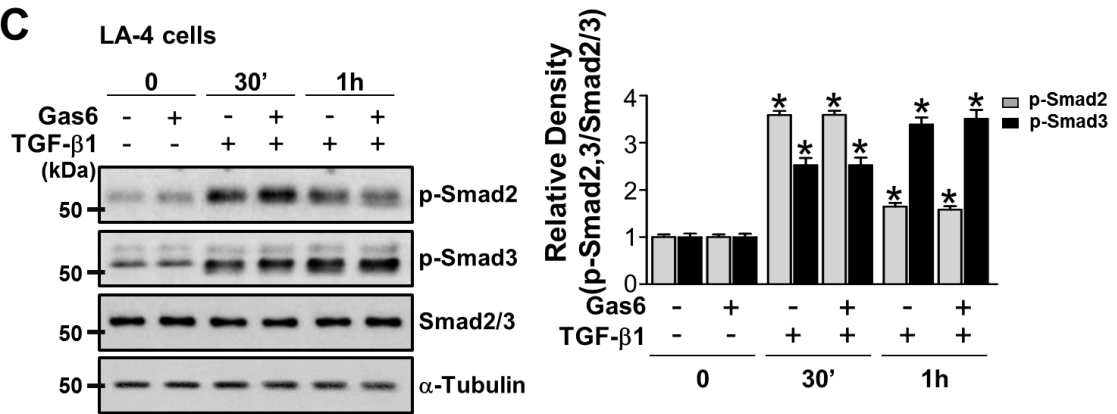**D**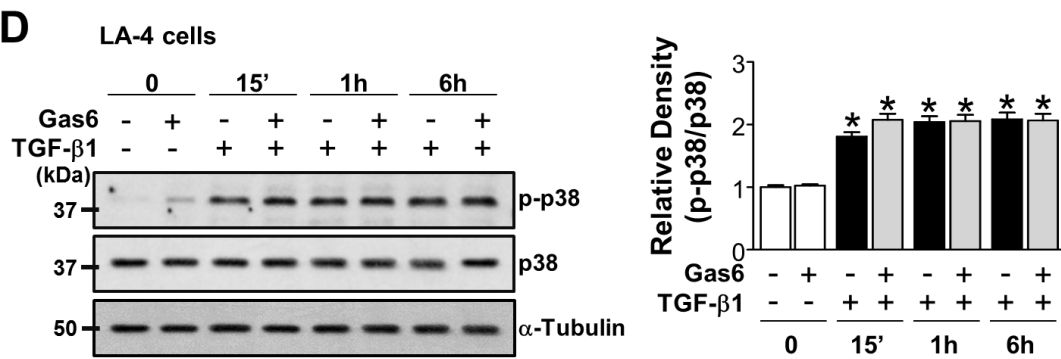

**Fig. S2. Effect of Gas6 pretreatment on epithelial-mesenchymal transition (EMT)-regulating transcription factor expression and TGF- $\beta$ 1 signaling in epithelial cells.** (A and B) A549 cells and HEK-295 were pretreated with 400 ng/ml Gas6 20 h prior to 10 ng/ml TGF- $\beta$ 1 stimulation for 72 h. qPCR analysis of *Snai1/2*, *Zeb1/2*, and *Twist1* mRNAs. (C and D) Immunoblot analysis of the relative amounts of total and phosphorylated Smad2, Smad3, and p38 MAP kinase protein in LA-4 cells over time. Alpha-tubulin was used as a loading control. Densitometric analysis of the relative phosphorylated protein abundances, normalized to that of total protein. Data in all bar graphs are the mean  $\pm$  s.e.m. of three independent experiments. \* $P$  < 0.05 compared with control; \* $P$  < 0.05 as indicated.

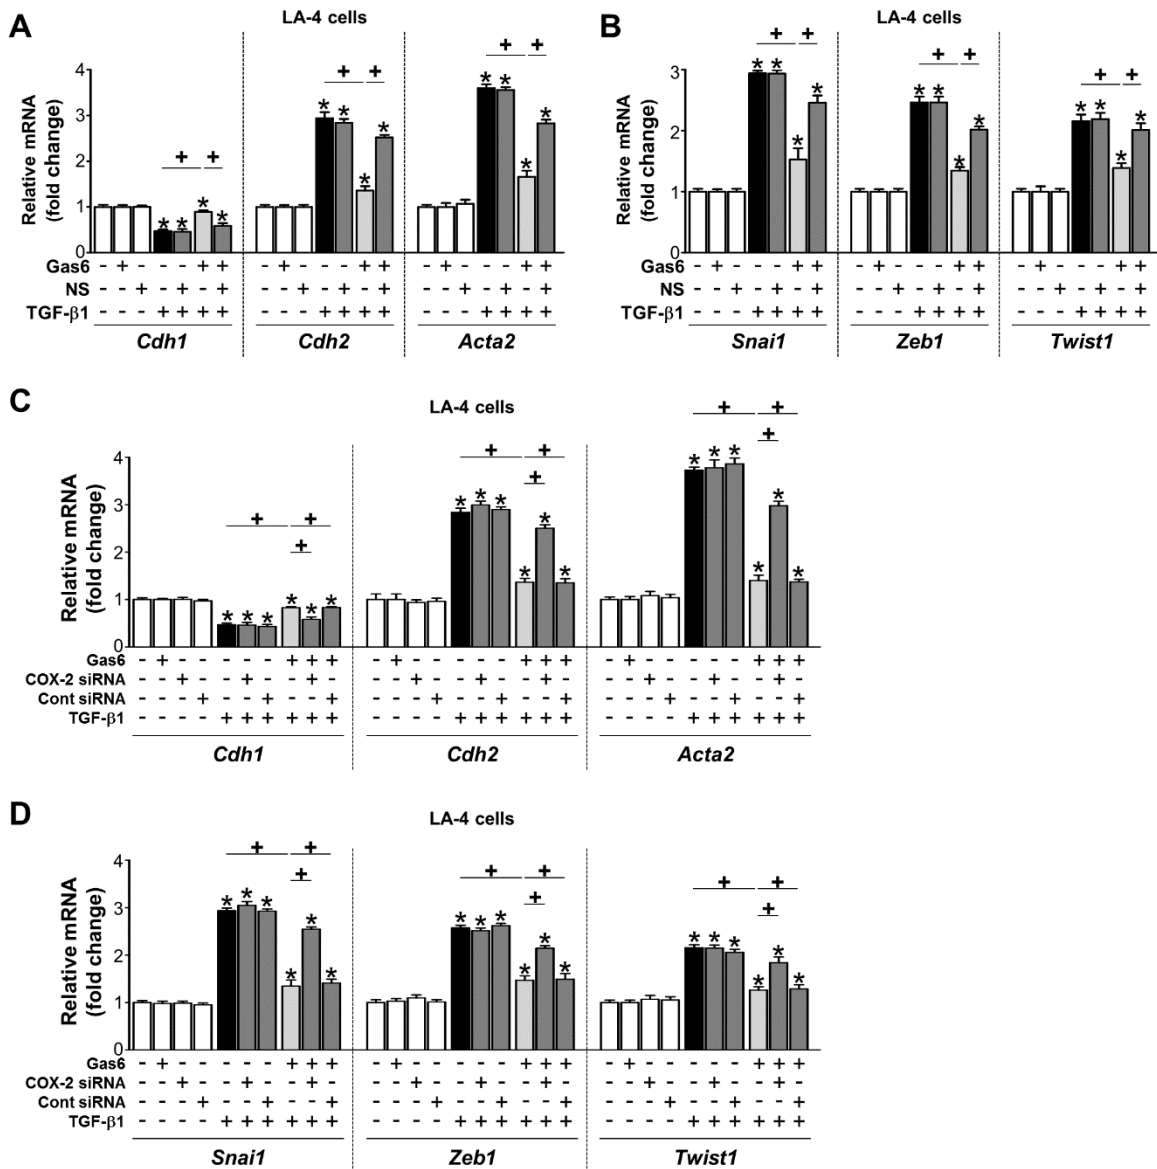

**Fig. S3. Cyclooxygenase (COX)-2 signaling is required for Gas6-induced inhibition of epithelial-mesenchymal transition (EMT) in LA-4 epithelial cells.** (A and B) LA-4 cells were pretreated with 10  $\mu$ M NS-398 1 h before 400 ng/ml Gas6 treatment for 20 h and then stimulated with 10 ng/ml TGF- $\beta$ 1 treatment for 72 h. qPCR analysis of EMT markers' and EMT-regulating transcription factors' mRNAs in cell lysates. (C and D) LA-4 cells were transfected with COX-2 specific or control siRNA for 6 h prior to treatment with 400 ng/ml Gas6 for 20 h and then stimulated with 10 ng/ml TGF- $\beta$ 1 for 72 h. qPCR analysis of EMT markers' and EMT-regulating transcription factors' mRNAs in cell lysates. Values represent the mean  $\pm$  s.e.m. of three independent experiments. \* $P$  < 0.05 compared with control; + $P$  < 0.05 as indicated.



**Fig. S4. Antagonists of prostaglandin (PG)E<sub>2</sub> and PGD<sub>2</sub> receptors reverse Gas6-induced epithelial-mesenchymal transition (EMT) inhibition in LA-4 epithelial cells.** (A to C) LA-4 cells were stimulated with 400 ng/ml Gas6 for 20 h and then stimulated with 10 ng/ml TGF- $\beta$ 1 with or without antagonists of EP2 (AH-6809), EP4 (AH-23848), DP1 (BW-A868C), or DP2 (BAY-u3405) at 10  $\mu$ M. (A) After 48 or 72 h, morphological changes in the cells were examined by phase-contrast microscopy (Scale bars = 50  $\mu$ m). (B) EMT markers' protein abundances were quantified by immunoblot analysis and normalized to  $\alpha$ -tubulin. (C) qPCR analysis of EMT markers' mRNAs in LA-4 cells. Values represent the mean  $\pm$  s.e.m. of three independent experiments. \* $P$  < 0.05 compared with control; + $P$  < 0.05 as indicated.

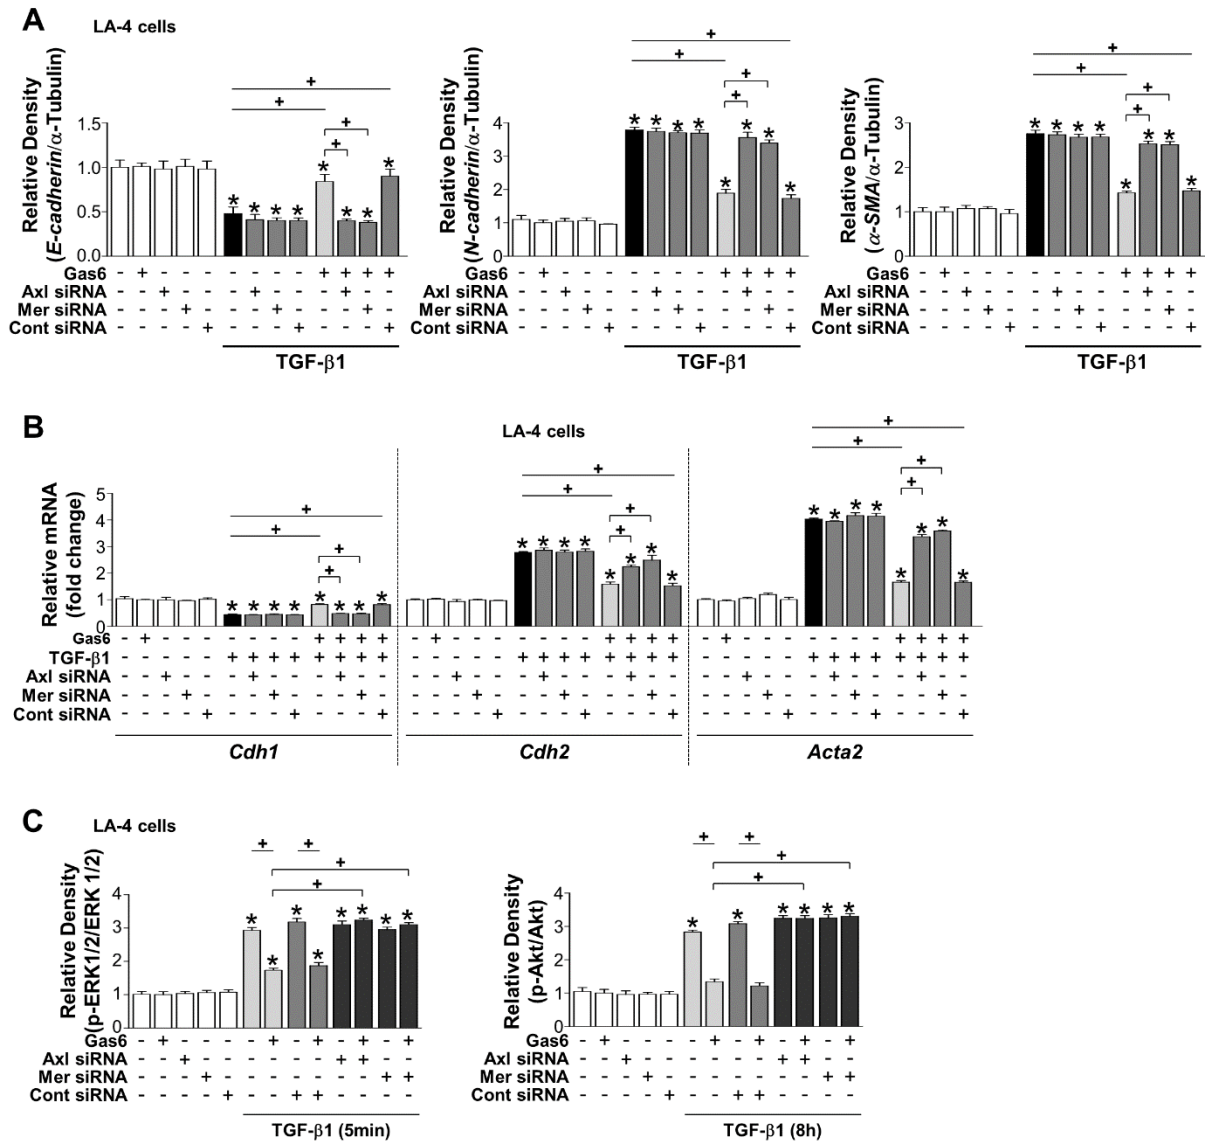

**Fig. S5. Inhibition of Axl or Mer signaling reverses suppression of epithelial-mesenchymal transition (EMT) in LA-4 epithelial cells by Gas6.** (A to C) LA-4 cells were transfected with Axl, Mer, or control siRNA for 48 h before 400 ng/ml Gas6 treatment for 20 h, and then stimulated with 10 ng/ml TGF- $\beta$ 1 for 72 h or the time indicated. (A) EMT markers' protein abundances were quantified by immunoblot analysis and normalized to  $\alpha$ -tubulin. (B) qPCR analysis of EMT markers' mRNAs in LA-4 cells. (C) Phosphorylated ERK and Akt levels were quantified by immunoblot analysis and normalized to total proteins. Values represent the mean  $\pm$  s.e.m. of three independent experiments. \* $P$  < 0.05; compared with control; + $P$  < 0.05 as indicated.

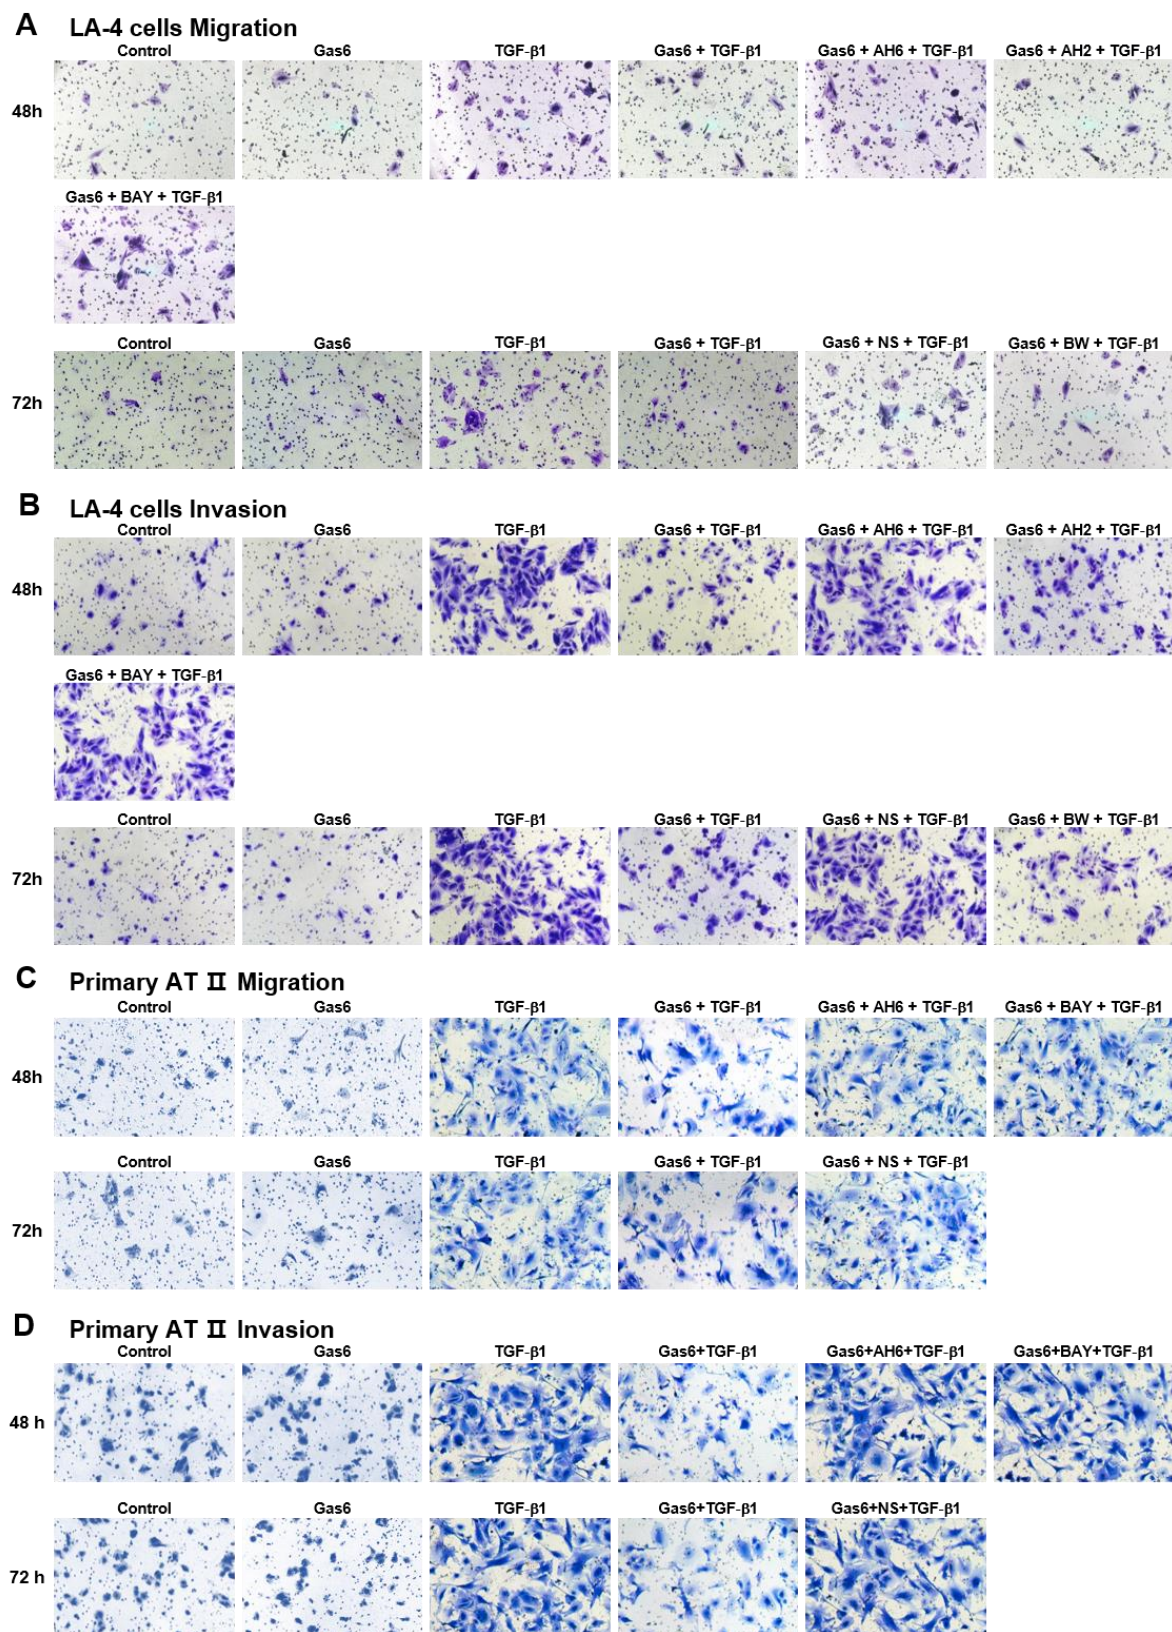

**Fig. S6. Gas6 inhibits on TGF- $\beta$ 1-induced migration and invasion through prostaglandin (PG) $E_2$  and PG $D_2$ .** (A to D) LA-4 and primary alveolar type II epithelial cells were stimulated with 400 ng/ml Gas6 for 20 h in the absence or presence of NS-398 at 10  $\mu$ M and then stimulated with 10 ng/mL TGF- $\beta$ 1 with or

without antagonists of EP2 (AH-6809), EP4 (AH-23848), DP1 (BW-A868C), or DP2 (BAY-u3405) at 10  $\mu$ M for 48 or 72 h. The cells were visualized by phase-contrast microscopy for the analysis of migratory and invasive abilities using Fibronectin-coated Transwell and Matrigel-coated Transwell plates, respectively. Scale bars: 100  $\mu$ m. Data are from one experiment representative of three independent experiments with similar results.
